# Supplementary material for: Metagenomic, Metabolomic, and Functional Evaluation of Kimchi Broth Treated with Light-Emitting Diodes (LEDs)
Source: MDPI journal article supplement (doi:10.3390/metabo11080472), 2021-07-22
Supplement: s1 [file s1]

# Metagenomic, Metabolomic, and Functional Evaluation of Kimchi Broth Treated with Light-Emitting Diodes (LEDs)

Yeong Ji Oh <sup>1,†</sup>, Ye Rin Park <sup>1,†</sup>, Jungil Hong <sup>2</sup> and Do Yup Lee <sup>1,\*</sup>

<sup>1</sup> Department of Food and Animal Biotechnology, Research Institute for Agriculture and Life Sciences, Center for Food and Bioconvergence, Seoul National University, Seoul 08826, Republic of Korea; yer-inpark@snu.ac.kr

<sup>2</sup> Division of Applied Food System, College of Natural Science, Seoul Women's University, 621 Hwarangro, Nowon-gu, Seoul 01797, Republic of Korea; hjil@swu.ac.kr

\* Correspondence: rome73@snu.ac.kr (D.Y.L.); anabaena@snu.ac.kr (Y.J.O.)

† These authors contributed equally to this work.

## Supplementary Materials

**Table S1.** Changes in bacterial community richness and diversity indices in LED-treated red pepper kimchi.

| Sample name | Target reads | <sup>1</sup> OTUs | <sup>2</sup> ACE | <sup>3</sup> Chao1 | <sup>4</sup> Jackknife | <sup>5</sup> Shannon | <sup>6</sup> Simpson | <sup>7</sup> Good's coverage of library (%) |
|-------------|--------------|-------------------|------------------|--------------------|------------------------|----------------------|----------------------|---------------------------------------------|
| Initial     | 86767        | 178               | 252.31           | 226.00             | 242.51                 | 1.01                 | 0.45                 | 99.93                                       |
| Dark        | 73832        | 159               | 215.14           | 198.37             | 212.19                 | 0.76                 | 0.65                 | 99.93                                       |
| Red         | 91661        | 137               | 207.63           | 178.13             | 188.62                 | 0.70                 | 0.69                 | 99.94                                       |
| Green       | 86547        | 140               | 180.56           | 165.80             | 183.00                 | 0.60                 | 0.74                 | 99.95                                       |
| Blue        | 83248        | 149               | 221.04           | 212.21             | 218.29                 | 0.65                 | 0.71                 | 99.93                                       |

<sup>1</sup>OTUs: Operational Taxonomic Unit (OTU) is a group of sequences clustered by sequence similarity.

<sup>2</sup>ACE: ACE (Abundance-based Coverage Estimator) is an indicator of species richness (total number of species in a sample) that is sensitive to rare OTUs (singletons and doubletons).

<sup>3</sup>Chao1: Chao1 is an indicator of species richness (total number of species in a sample) that is sensitive to rare OTUs (singletons and doubletons).

<sup>4</sup>Jackknife: Jackknife is an indicator of species richness (total number of species in a sample) that is sensitive to rare OTUs (singletons and doubletons) as well as to abundant OTUs (triplettons and more).

<sup>5</sup>Shannon: The Shannon index takes into account the number and evenness of species.

<sup>6</sup>Simpson: Simpson is an indicator of species evenness (proportional distribution of the number of each species in a sample) that displays the probability that two randomly selected sequences are of the same species.

<sup>7</sup>Good's coverage of library (%): number of sequencing reads used for analysis represents the actual species population of the sample. The value can range from 0 to 100%, with 100% indicating a complete sampling of species, meaning that additional sequencing is unlikely to find any more new species.

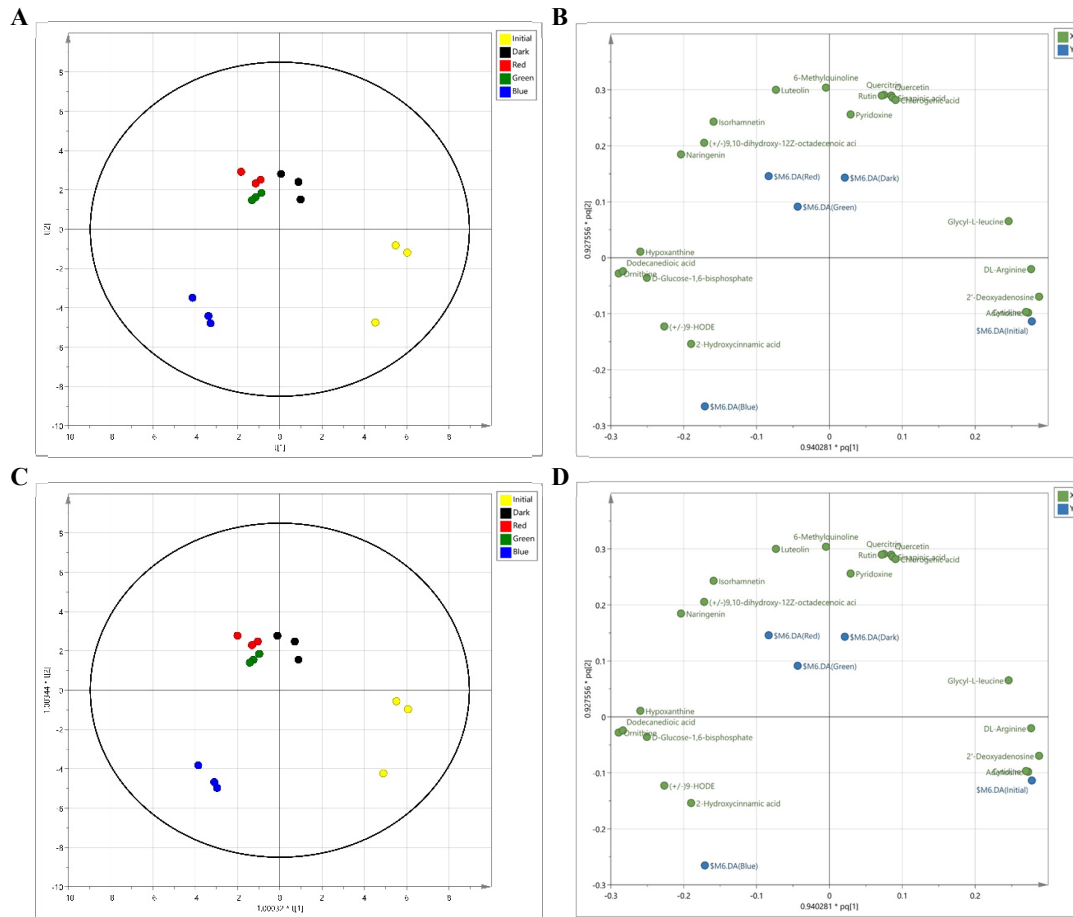

**Figure S1.** Multivariate statistical analysis of metabolic profiles of LED-irradiated kimchi broths. 22 metabolites that were significantly different among the groups (ANOVA,  $p < 0.05$ ) were used to perform the multivariate analysis. (A) Score plot of the kimchi extracts based on principal component analysis (PCA). The variance is most explained by t1 vector (44.5%). 2 components are needed to reach 84.5 % of overall variance. (B) Loading plot based on PCA. (C) Score plot of the kimchi extract based on orthogonal projection to latent structures-discriminant analysis (OPLS-DA). The variance is explained by PC1 and PC2 at 24.6 % and 23.0 % for each component. 4 components are needed to reach 82.4 % of overall variance. (D) Loading plot based on OPLS-DA.
